# Supplementary material for: Rational engineering of Streptomyces albus J1074 for the overexpression of secondary metabolite gene clusters
Source: PubMed Central journal article supplement (PMC5816538; doi:10.1186/s12934-018-0874-2), 2018-02-17
Supplement: 12934_2018_874_MOESM1_ESM.pdf [file 12934_2018_874_MOESM1_ESM.pdf]

## **Additional file for:**

**Title:** Rational engineering of *Streptomyces albus* J1074 for the overexpression of secondary metabolite gene clusters

**Authors:** Dimitris Kallifidas<sup>1,2\*</sup>, Guangde Jiang<sup>1,2</sup>, Yousong Ding<sup>1,2</sup>, Hendrik Luesch<sup>1,2\*</sup>

<sup>1</sup> Department of Medicinal Chemistry, College of Pharmacy, University of Florida, Gainesville, Florida 32610, USA

<sup>2</sup> Center for Natural Products, Drug Discovery and Development (CNPD3), University of Florida, Gainesville, Florida 32610, USA

\*Corresponding authors: [dkallifidas@ufl.edu](mailto:dkallifidas@ufl.edu), [luesch@cop.ufl.edu](mailto:luesch@cop.ufl.edu)

Figure S1: Confirmation of upregulation of paulomycin gene cluster by CRP<sub>sc</sub> overexpression and WblA<sub>SA</sub> deletion using LC-MS profiling. **Page S2**

Figure S2: Monitoring of the paulomycin A/B and paulomenol A/B production by LC-MS profiling. **Page S3**

Figure S3: MS fragmentation pattern of paulomenol A **Page S4**

Figure S4: MS fragmentation pattern of paulomenol B **Page S5**

Figure S5: MS fragmentation pattern of paulomycin A **Page S6**

Figure S6: MS fragmentation pattern of paulomycin B **Page S7**

Table S1: Detection of putative CRP<sub>sc</sub> binding sites in paulomycin gene cluster using GTG(N)<sub>6</sub>GNCAC motif. **Page S8**

Table S2: Detection of putative CRP<sub>sc</sub> binding sites in paulomycin gene cluster using GTG(N)<sub>6</sub>GNGAN motif. **Page S8**

**Figure S1:** Confirmation of upregulation of paulomycin gene cluster (*plm*) by CRP<sub>SC</sub> overexpression and WblA<sub>SA</sub> deletion by LC-MS analysis of organic extracts prepared from *Streptomyces albus* J1074 engineered strains grown in R5A media for 4 days. 1, paulomycin B; 2, paulomycin A; 3, paulomenol B; 4, paulomenol A.

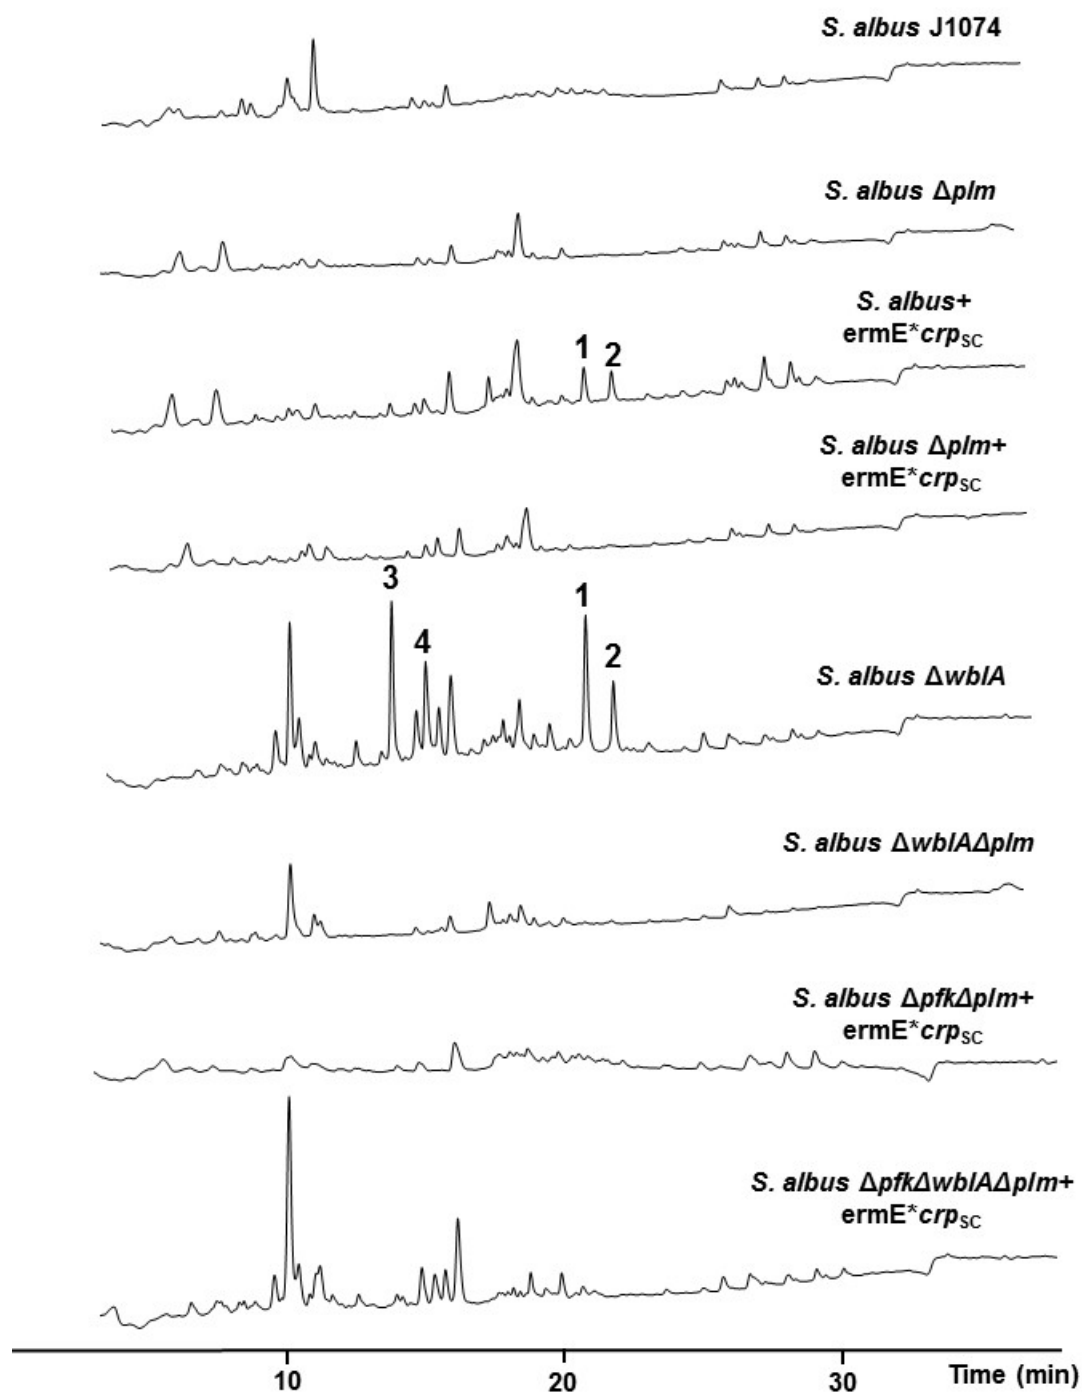

**Figure S2:** LC-MS analysis of *S. albus*  $\Delta wblA$  culture extracts collected daily for 6 days from R5A fermentation broths. 1, paulomycin B; 2, paulomycin A; 3, paulomenol B; 4, paulomenol A.

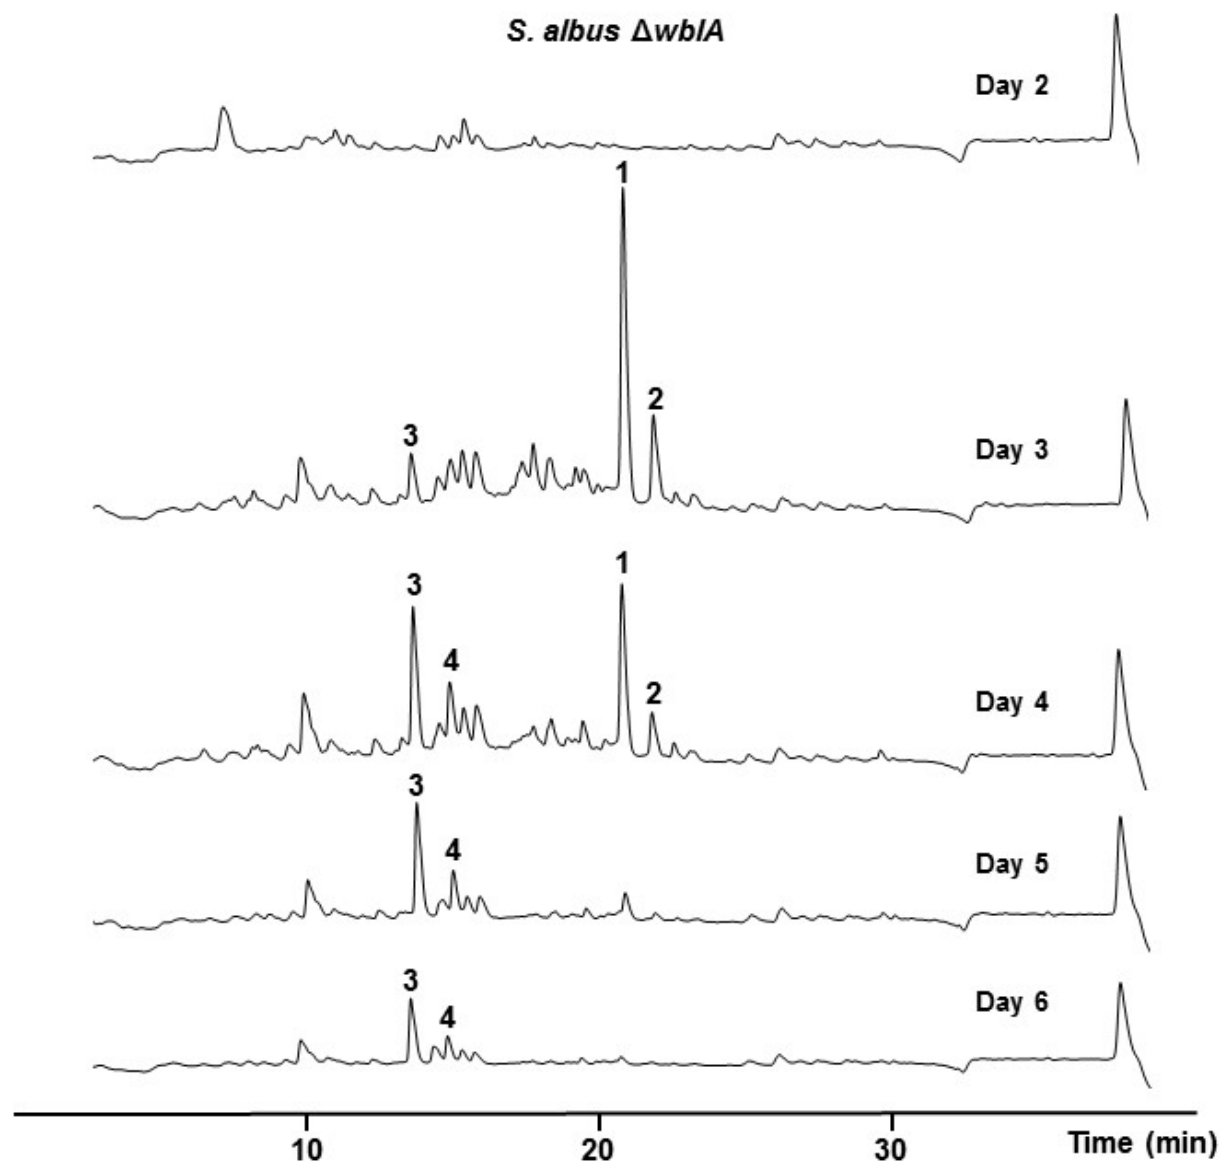

**Figure S3:** MS fragmentation pattern of paulomenol A. Negative mode.

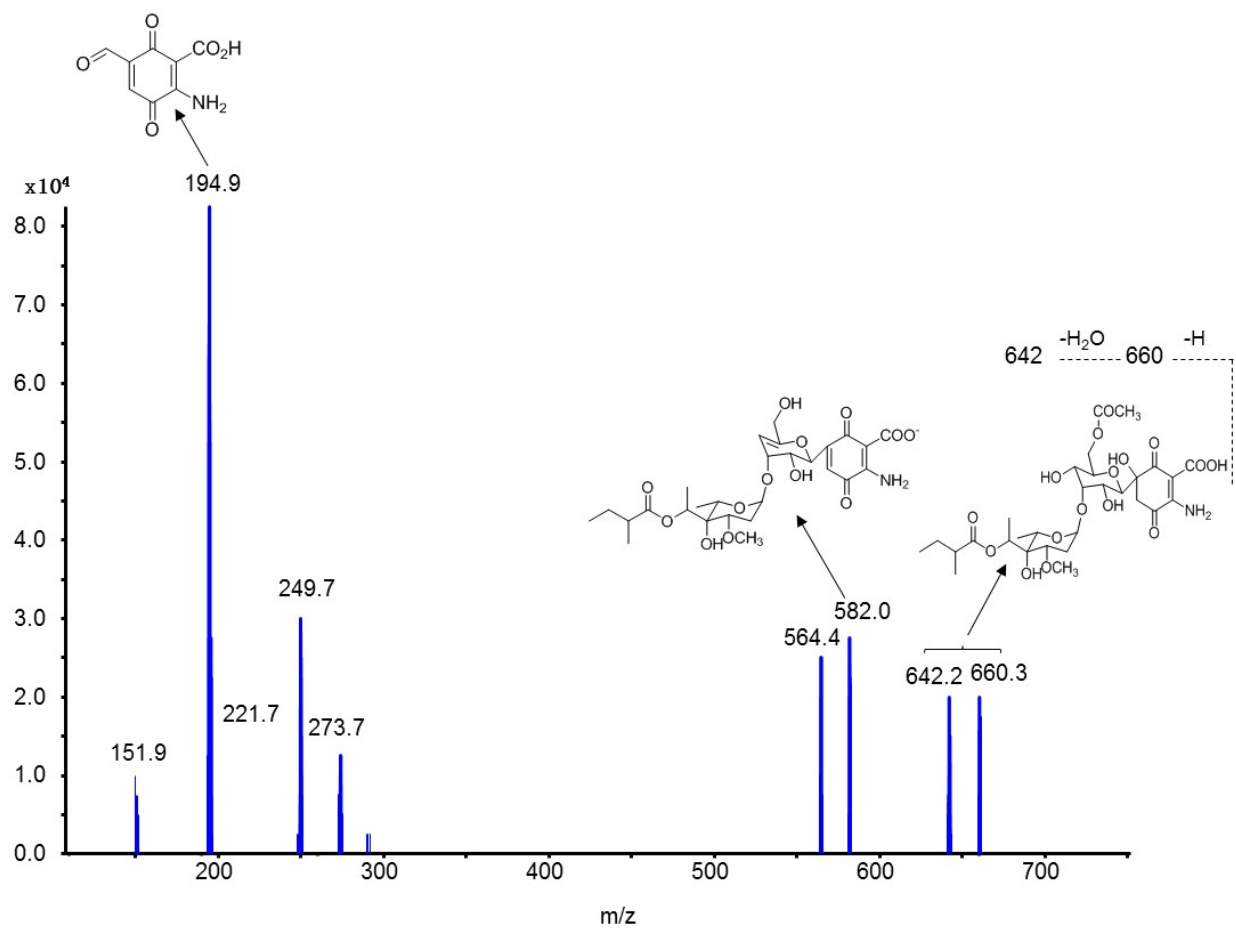

**Figure S4:** MS fragmentation pattern of paulomenol B. Negative mode.

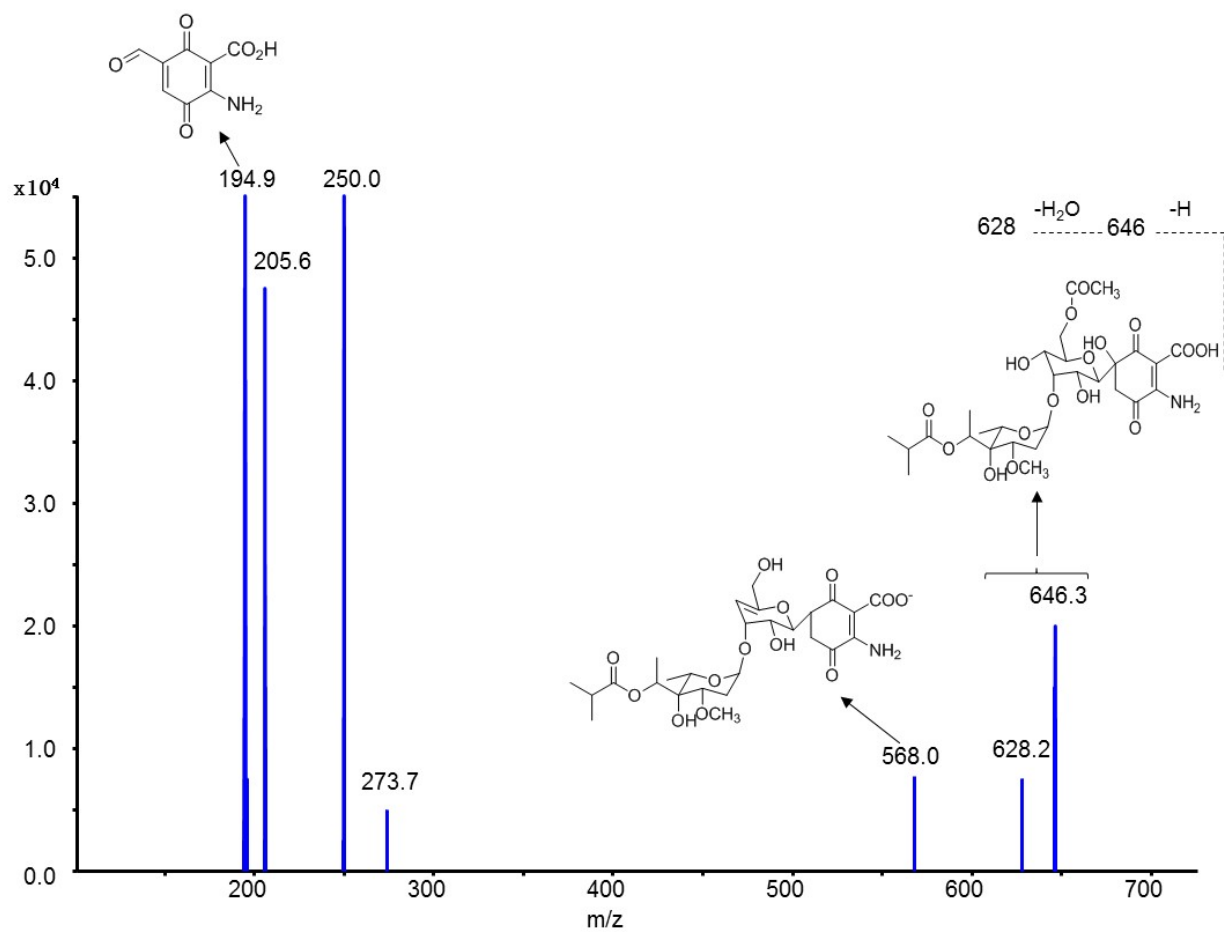

**Figure S5:** MS fragmentation pattern of paulomycin A. Negative mode.

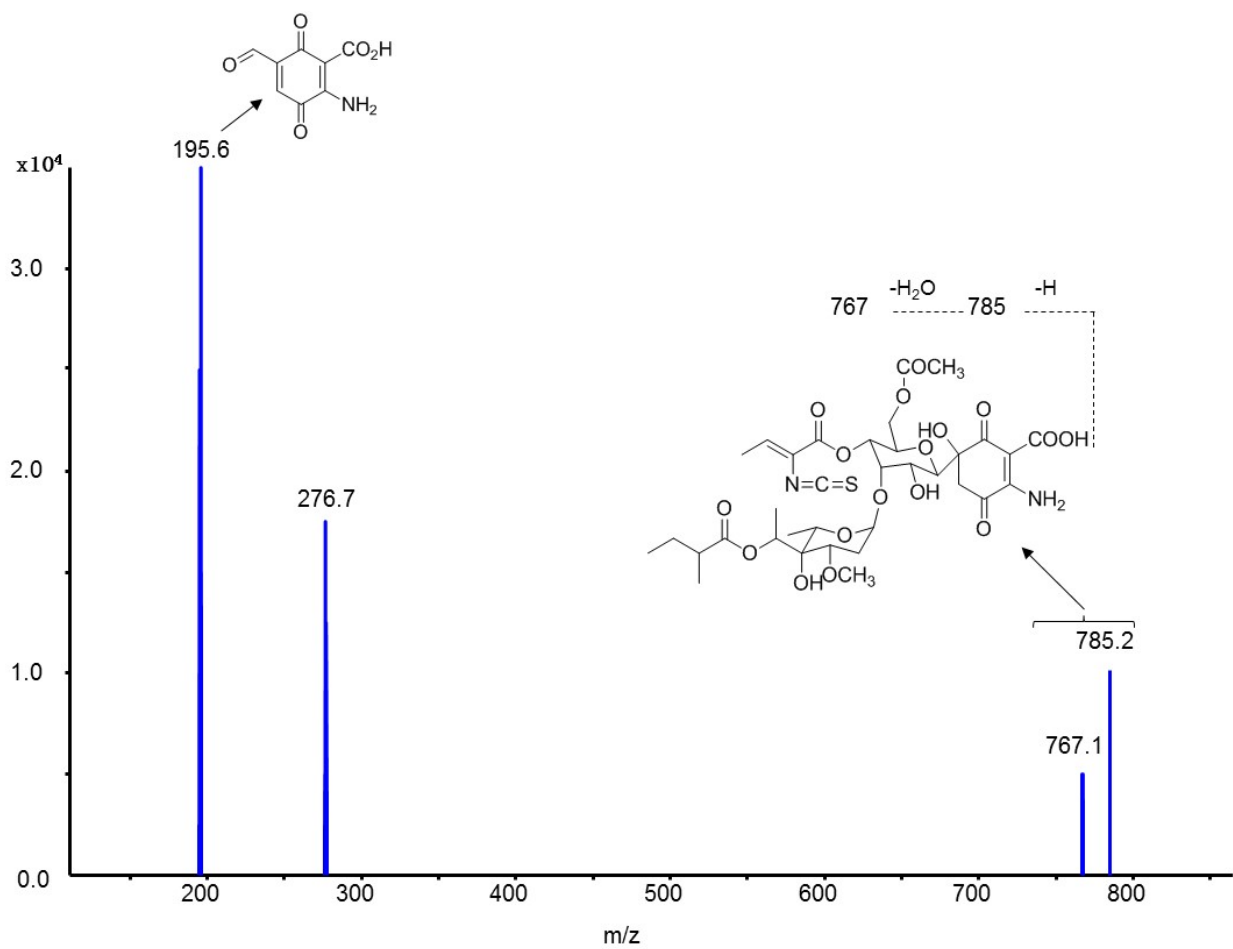

**Figure S6:** MS fragmentation pattern of paulomycin B. Negative mode.

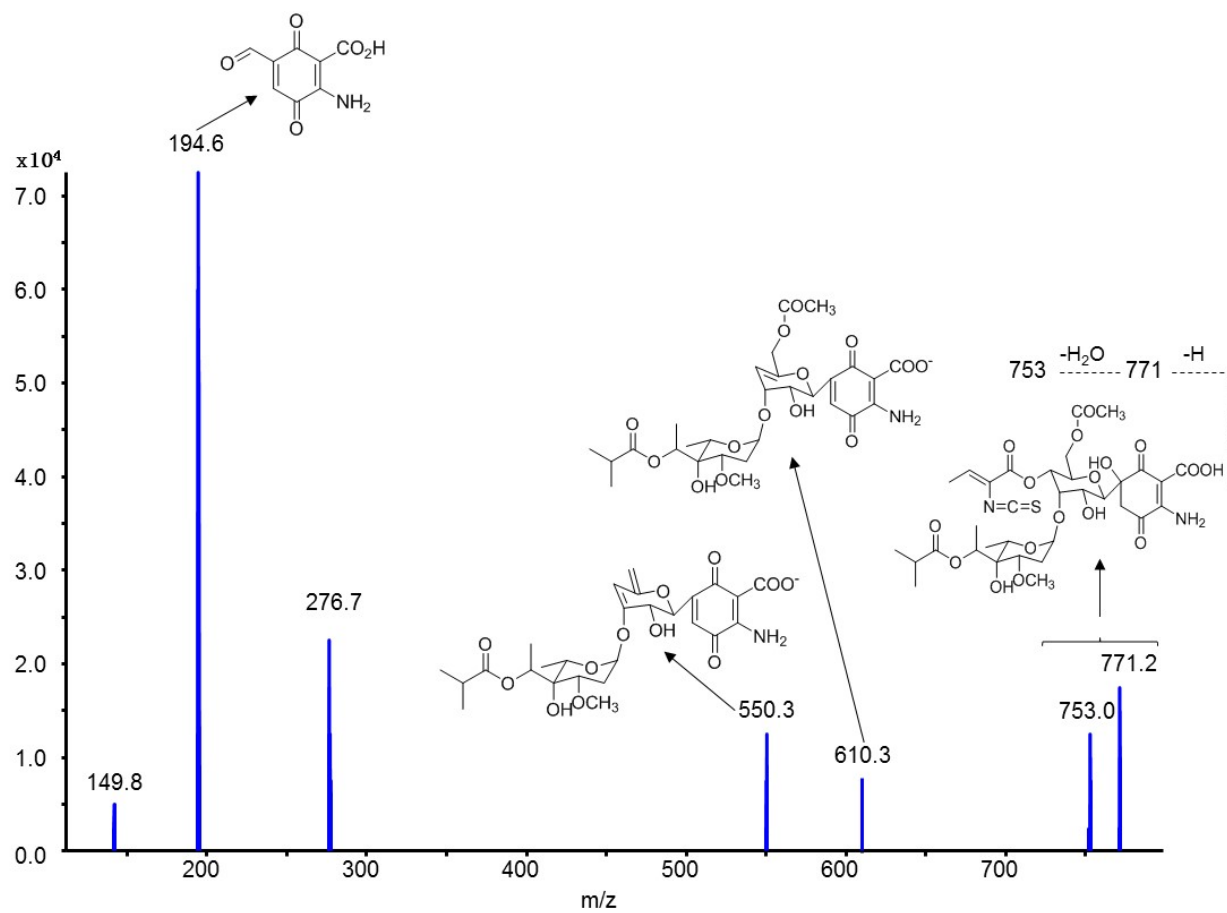

**Table S1:** Sequence scanning of paulomycin (*plm*) gene cluster for the detection of putative CRP<sub>sc</sub> binding sites using the GTG(N)<sub>6</sub>GNCAC motif. Distance from the beginning of the motif to the start codon of the corresponding genes is reported. Negative values indicate sites upstream of start codons while positive values indicate sites within open reading frames.

| <i>plm</i> gene | Function                                   | distance | Binding site           |
|-----------------|--------------------------------------------|----------|------------------------|
| <i>plm</i> 12   | Glycosyltransferase                        | +130     | cctcGTGGACACCGCCACcggc |
| <i>plm</i> 28   | Putative sulfotransferase                  | +628     | ggcgGTGGCCATGGCCACggag |
| <i>plm</i> 29   | Aminotransferase                           | +91      | cctgGTGCCGCTCGTCACcggc |
| <i>plm</i> 35   | Ribulose-5-phosphate-4-epimerase           | +29      | acgcGTGAGCGAGGGCACcccg |
| <i>plm</i> 37   | Acyl-CoA dehydrogenase                     | +763     | cgcgGTGGGGCTCGCCACcgcg |
| <i>plm</i> 40   | dTDP-4-keto-6-deoxy-L-hexose 2,3-reductase | +301     | ccggGTGGTGCTGGCCACcaag |

**Table S2:** Sequence scanning of paulomycin (*plm*) gene cluster for the detection of putative CRP<sub>sc</sub> binding sites using the GTG(N)<sub>6</sub>GNGAN motif. Distance from the beginning of the motif to the start codon of the corresponding genes is reported. Negative values indicate sites upstream of start codons while positive values indicate sites within open reading frames.

| <i>plm</i> gene | Function                                | distance | Binding site           |
|-----------------|-----------------------------------------|----------|------------------------|
| <i>plm</i> 2    | TetR-family transcriptional regulator   | -5       | ggggGTGCGATGCGGGACgcg  |
| <i>plm</i> 4    | Oxidoreductase                          | +162     | ttcgGTGGGGACGGGGACcgg  |
| <i>plm</i> 6    | EmrB/QacA subfamily transporter         | +1230    | cagcGTGCCCGCCGCGACcagc |
| <i>plm</i> 7    | Elongation factor G1                    | +1620    | gttcGTGAACAAGGTGACcgg  |
| <i>plm</i> 8    | Dehydrogenase E1 alpha subunit          | -299     | gggaGTGACCGACGCGACagcg |
| <i>plm</i> 8    | Dehydrogenase E1 alpha subunit          | +900     | gctgGTGGCGGAGGCGAGggac |
| <i>plm</i> 9    | Dehydrogenase E1 beta subunit           | +333     | cggcGTGCCCGTGGTGACccgg |
| <i>plm</i> 9    | Dehydrogenase E1 beta subunit           | +507     | ggtgGTGCTCATCGAGAAccgc |
| <i>plm</i> 9    | Dehydrogenase E1 beta subunit           | +825     | cgcgGTGGTGCCGAGAAcgt   |
| <i>plm</i> 9    | Dehydrogenase E1 beta subunit           | +864     | cccgGTGCGGCGGGTGACcctg |
| <i>plm</i> 10   | SARP-family transcriptional regulator   | +153     | ccagGTGCTCCCGCGACAacg  |
| <i>plm</i> 12   | Glycosyltransferase                     | +672     | ggacGTGGCCGGGAGACgctc  |
| <i>plm</i> 23   | C-glycosyltransferase                   | +204     | ggcgGTGCCCTGGTGAGgtcc  |
| <i>plm</i> 28   | Putative sulfotransferase               | +390     | cctcGTGGTGTGCGGAGcag   |
| <i>plm</i> 32   | Acyl-CoA synthase                       | +1221    | cgtgGTGCTCGAAGTGACcgac |
| <i>plm</i> 42   | dTDP-4-keto-6-deoxyhexose 3,5-epimerase | -9       | tgaaGTGGGGAGAGTGAGcccc |
